# Supplementary material
Source: MDPI journal article supplement (https://www.mdpi.com/2079-6412/12/10/1466)
Supplement: s1 [file s1]

# Metakaolin-Reinforced Sulfoaluminate-Cement-Solidified Wasteforms of Spent Radioactive Resins—Optimization by a Mixture Design

Jiaqian Xu, Mengzhou Wang, Cong Li, Mengxing Han, Qi Wang and Qina Sun \*,

Hebei Key Laboratory of Heavy Metal Deep-Remediation in Water and Resource Reuse,  
School of Environmental and Chemical Engineering, Yanshan University, Qinhuangdao 066004, China  
\* Correspondence: sunqn@ysu.edu.cn

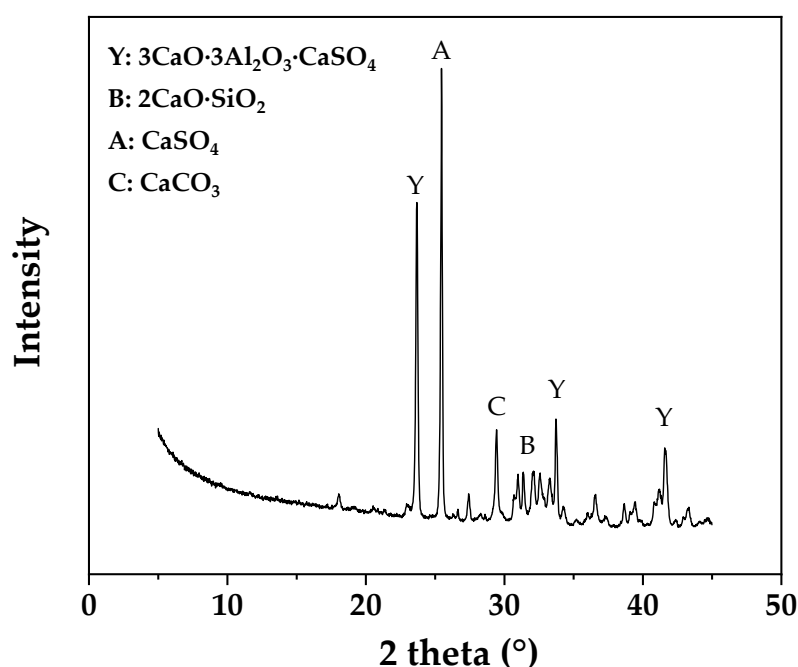

**Figure S1.** Main mineral components of the sulfoaluminate cement used in the solidification experiment.

**Table S1.** Main composition and property of the ion exchange resin used in the solidification experiment.

| Ion exchange resin | Matrix                     | Functional group | Total exchange capacity (mmol/g) |
|--------------------|----------------------------|------------------|----------------------------------|
| Zhengguang         | Polystyrene-divinylbenzene | Sulfonate        | 4.35                             |

**Table S2.** Mixture design and experimental data.

| Runs | Mixture composition (wt.%) |                |                |                | Responses            |                      |                     |                    |
|------|----------------------------|----------------|----------------|----------------|----------------------|----------------------|---------------------|--------------------|
|      | X <sub>1</sub>             | X <sub>2</sub> | X <sub>3</sub> | X <sub>4</sub> | Y <sub>1</sub> (MPa) | Y <sub>2</sub> (min) | Y <sub>3</sub> (mm) | Y <sub>4</sub> (%) |
| 1    | 39.8                       | 51.8           | 5.9            | 2.5            | 8.23                 | 64                   | 222                 | 67.6               |
| 2    | 48                         | 47.3           | 2.2            | 2.5            | -                    | 65                   | -                   | 86.5               |
| 3    | 45.1                       | 47             | 5.9            | 2              | -                    | 61                   | 295                 | 78.9               |
| 4*   | 35                         | 57.6           | 5.3            | 2.2            | 14.63                | 46                   | 177                 | 59.5               |
| 5*   | 42.9                       | 52.7           | 2.2            | 2.2            | -                    | 61                   | 285                 | 75.0               |
| 6    | 48                         | 47.8           | 2.2            | 2              | -                    | 65                   | -                   | 92.1               |
| 7*   | 41.5                       | 52.4           | 4.1            | 2              | 10.46                | 44                   | 263                 | 72.6               |
| 8    | 39.7                       | 55.1           | 3.1            | 2.1            | 8.53                 | 60                   | 243                 | 71.5               |
| 9    | 45.9                       | 47             | 4.8            | 2.3            | -                    | 67                   | 261                 | 78.0               |
| 10   | 36.2                       | 57.8           | 4.3            | 2.5            | 13.66                | 52                   | 183                 | 63.3               |
| 11   | 38.2                       | 53.4           | 5.9            | 2.5            | 8.2                  | 54                   | 210                 | 66.8               |
| 12*  | 35                         | 57.6           | 5.3            | 2.2            | 10.92                | 42                   | 163                 | 61.2               |
| 13*  | 41.5                       | 52.4           | 4.1            | 2              | 7.93                 | 52                   | 240                 | 74.8               |
| 14   | 43.1                       | 49.7           | 4.9            | 2.2            | 7.23                 | 60                   | 265                 | 80.1               |
| 15*  | 42.9                       | 52.7           | 2.2            | 2.2            | 8.26                 | 60                   | 265                 | 79.7               |
| 16   | 37                         | 57.8           | 3.2            | 2              | 11.81                | 56                   | 180                 | 66.7               |
| 17   | 45.9                       | 47             | 4.8            | 2.3            | 4.08                 | 67                   | 275                 | 82.7               |
| 18   | 36.2                       | 57.8           | 3.4            | 2.5            | 11.77                | 49                   | 180                 | 65.2               |
| 19   | 44.7                       | 49.7           | 3.5            | 2.1            | 7.16                 | 61                   | 296                 | 83.0               |
| 20   | 41.4                       | 50.2           | 5.9            | 2.5            | 7.06                 | 71                   | 258                 | 74.6               |

\* Repeated runs.

**Table S3.** Regression model coefficients.

| Responses      | $\beta_1$          | $\beta_2$          | $\beta_3$          | $\beta_4$           | $\beta_{12}$       | $\beta_{13}$        | $\beta_{14}$       | $\beta_{23}$        | $\beta_{24}$       | $\beta_{34}$       |
|----------------|--------------------|--------------------|--------------------|---------------------|--------------------|---------------------|--------------------|---------------------|--------------------|--------------------|
| Y <sub>1</sub> | 3.12               | 13.81              | 11.12              | -11.36              | -                  | -                   | -                  | -                   | -                  | -                  |
| Y <sub>2</sub> | 65.59              | 75.29              | $2.34 \times 10^2$ | $-4.47 \times 10^3$ | -24.35             | $-2.57 \times 10^2$ | $4.68 \times 10^2$ | $-4.09 \times 10^2$ | $4.29 \times 10^3$ | $6.64 \times 10^3$ |
| Y <sub>3</sub> | $3.02 \times 10^2$ | $1.34 \times 10^2$ | $0.62 \times 10^2$ | $-1.04 \times 10^4$ | $1.64 \times 10^2$ | $-4.89 \times 10^2$ | $1.10 \times 10^4$ | $-4.39 \times 10^2$ | $1.18 \times 10^4$ | $6.99 \times 10^3$ |
| Y <sub>4</sub> | 90.42              | 63.45              | 52.57              | 36.04               | -                  | -                   | -                  | -                   | -                  | -                  |

**Table S4.** ANOVA results of the regression model.

| Responses      | Source of variance | Degree of freedom | Sum of squares       | Mean square          | F value | P > F   | Significance    |
|----------------|--------------------|-------------------|----------------------|----------------------|---------|---------|-----------------|
| Y <sub>1</sub> | Model              | 3                 | $1.8779 \times 10^2$ | 62.60                | 32.44   | <0.0001 | Significant     |
|                | residual           | 16                | 30.88                | 1.93                 | -       | -       | -               |
|                | Lack of fit        | 11                | 11.85                | 1.08                 | 0.28    | 0.9622  | Not significant |
|                | Pure error         | 5                 | 19.02                | 3.80                 | -       | -       | -               |
|                | Total              | 9                 | $2.1867 \times 10^2$ | -                    | -       | -       | -               |
| Y <sub>2</sub> | Model              | 9                 | $1.1578 \times 10^3$ | $1.2866 \times 10^2$ | 11.23   | <0.0004 | Significant     |
|                | residual           | 10                | $1.1461 \times 10^2$ | 11.46                | -       | -       | -               |
|                | Lack of fit        | 5                 | 69.91                | 13.92                | 1.55    | 0.3219  | Not significant |
|                | Pure error         | 5                 | 45                   | 9.00                 | -       | -       | -               |
|                | Total              | 19                | $1.2725 \times 10^3$ | -                    | -       | -       | -               |
| Y <sub>3</sub> | Model              | 9                 | $3.9137 \times 10^4$ | $4.3485 \times 10^3$ | 30.79   | <0.0001 | Significant     |
|                | residual           | 10                | $1.4124 \times 10^3$ | $1.4124 \times 10^2$ | -       | -       | -               |
|                | Lack of fit        | 5                 | $7.4735 \times 10^2$ | $1.4947 \times 10^2$ | 43.47   | 0.4506  | Not significant |
|                | Pure error         | 5                 | 665.00               | 133.00               | -       | -       | -               |
|                | Total              | 19                | $4.0561 \times 10^4$ | -                    | -       | -       | -               |

|                |             |    |                      |                      |       |         |                 |
|----------------|-------------|----|----------------------|----------------------|-------|---------|-----------------|
|                | Total       | 19 | $4.0549 \times 10^4$ | -                    | -     | -       | -               |
|                | Model       | 3  | $1.3949 \times 10^3$ | $4.6497 \times 10^2$ | 96.76 | <0.0001 | Significant     |
|                | residual    | 16 | 76.89                | 4.81                 | -     | -       | -               |
| Y <sub>4</sub> | Lack of fit | 11 | 48.97                | 4.45                 | 0.80  | 0.6509  | Not significant |
|                | Pure error  | 5  | 27.91                | 5.58                 | -     | -       | -               |
|                | Total       | 19 | $1.4718 \times 10^3$ | -                    | -     | -       | -               |
